# Supplementary material for: Polypyrrole with Phosphor Tungsten Acid and Carbide-Derived Carbon: Change of Solvent in Electropolymerization and Linear Actuation
Source: MDPI journal article supplement (doi:10.3390/ma14216302), 2021-10-22
Supplement: s1 [file s1]

Supplementary materials

# Polypyrrole with Phosphor Tungsten Acid and Carbide-Derived Carbon: Change of Solvent in Electropolymerization and Linear Actuation.

Chau B. Tran <sup>1</sup>, Zane Zondaka <sup>2</sup>, Quoc Bao Le <sup>3</sup>, Bharath Kumar Velmurugan <sup>4</sup> and Rudolf Kiefer <sup>3,\*</sup>

<sup>1</sup> Faculty of Applied Sciences, Ton Duc Thang University, Ho Chi Minh City 700000, Vietnam; tranboichau@tdtu.edu.vn

<sup>2</sup> Intelligent Materials and Systems Lab, Faculty of Science and Technology, University of Tartu, Nooruse 1, 50411 Tartu, Estonia; zane.zondaka@ut.ee

<sup>3</sup> Conducting polymers in composites and applications Research Group, Faculty of Applied Sciences, Ton Duc Thang University, Ho Chi Minh City 700000, Vietnam; lequocbao@tdtu.edu.vn (Q.B.L.); rudolf.kiefer@tdtu.edu.vn (R.K.)

<sup>4</sup> Department of Medical Laboratory Science and Biotechnology, Asia University, Taichung 413 Taiwan; bharathvel@gmail.com

\* Correspondence: author. Tel: +886 905605515. E-mail: rudolf.kiefer@tdtu.edu.vn (R. K.)

**Citation:** Tran, C.B.; Zondaka, Z.; Le, Q.B.; Velmurugan, B.K.; Kiefer, R. Polypyrrole with Phosphor Tungsten Acid and Carbide-Derived Carbon: Change of Solvent in Electropolymerization and Linear Actuation. *Materials* **2021**, *14*, 6302. <https://doi.org/10.3390/ma14216302>

Academic Editor: Seung Hwan Ko

Received: 27 September 2021

Accepted: 19 October 2021

Published: 22 October 2021

**Publisher's Note:** MDPI stays neutral with regard to jurisdictional claims in published maps and institutional affiliations.

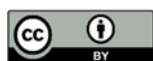

**Copyright:** © 2021 by the authors. Licensee MDPI, Basel, Switzerland. This article is an open access article distributed under the terms and conditions of the Creative Commons Attribution (CC BY) license (<http://creativecommons.org/licenses/by/4.0/>).

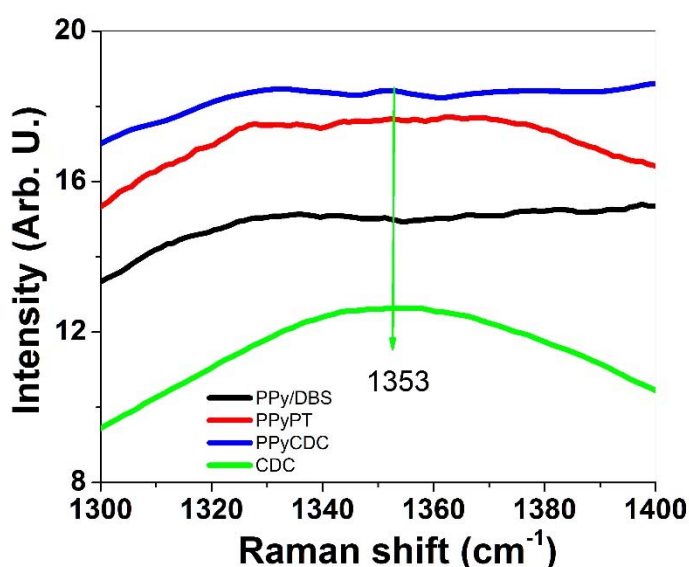

**Figure S1.** Raman spectra's (1350 – 1450  $\text{cm}^{-1}$ , 514 nm) of pristine PPy films in oxidized state (1.0 V) such as PPY/DBS-EG (black line), PPYPT-EG (red line), PPYCDC-EG (blue line) and CDC (green line).

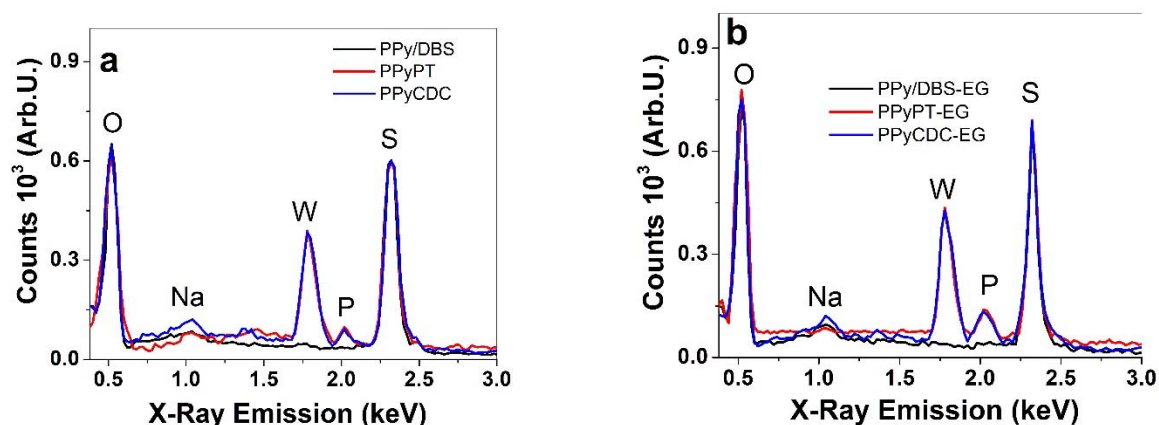

**Figure S2.** EDX spectroscopy of pristine PPy/DBS and PPy/DBS-EG (black line), PPyPT and PPyPT-EG (red line) and PPyCDC and PPyCDC-EG (blue line) in oxidized state (1.0V) showing in (a), PPy composites made in EG:Milli-Q+ (1:1) and in (b), those made in EG solvent.

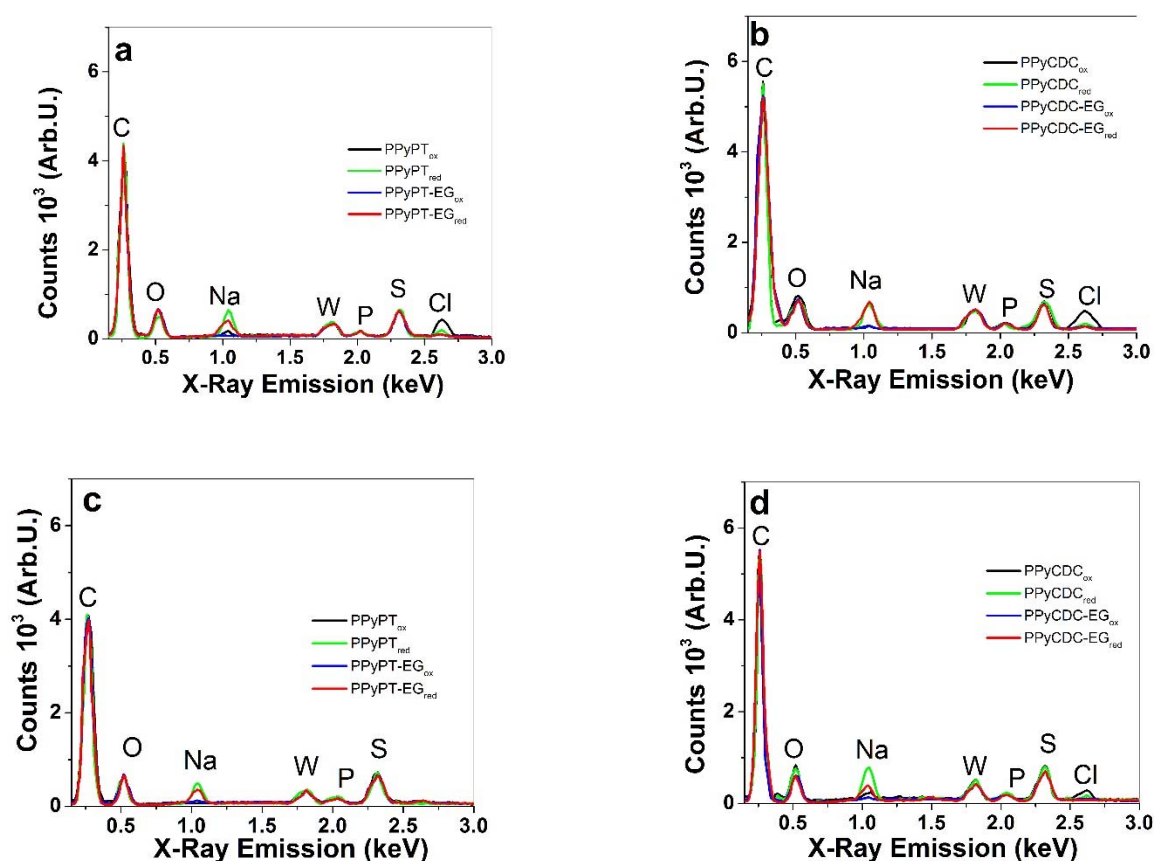

**Figure S3.** (a), EDX spectroscopy at cross section in oxidized state (5 min, 0.65V) and reduced state (5 min -0.6V) of PPy composite samples such as PPyPT<sub>ox</sub> and PPyCDC<sub>ox</sub> (black line), PPyPT<sub>red</sub>, PPyCDC<sub>red</sub> (green line), PPyPT-EG<sub>ox</sub>, PPyCDC-EG<sub>ox</sub> (blue line) and PPyPT-EG<sub>red</sub>, PPyCDC-EG<sub>red</sub> (red line), in (b), PPy samples in NaClO<sub>4</sub>-PC and in (c,d), those in NaClO<sub>4</sub>-aq electrolytes.

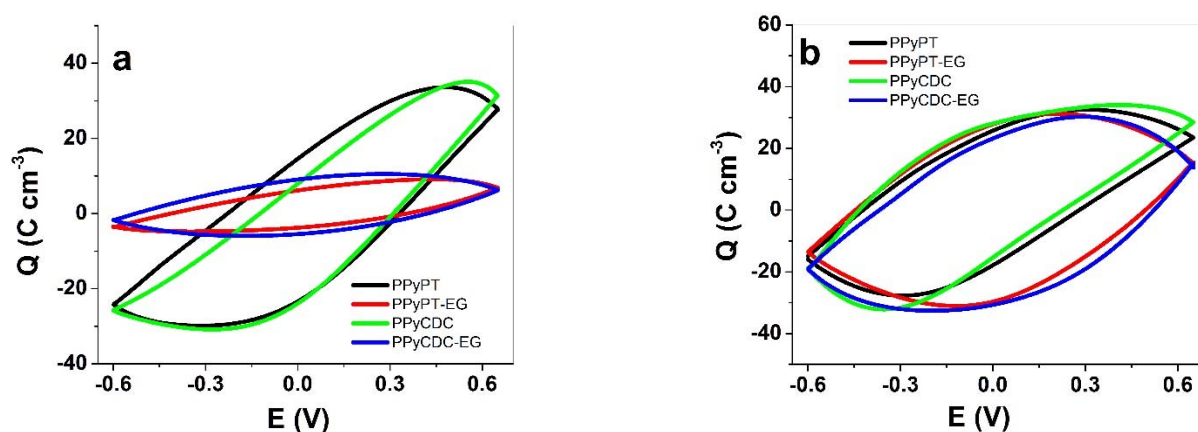

**Figure S4.** Coulouvoltammetry (3rd cycle) of PPyPT (black line), PPyPT-EG (red line), PPyCDC (green line) and PPyCDC-EG (blue line) of charge density against potential  $E$  (0.65V to  $-0.6$ V) performed in (a), of NaClO<sub>4</sub>-PC and (b), NaClO<sub>4</sub>-aq electrolyte.

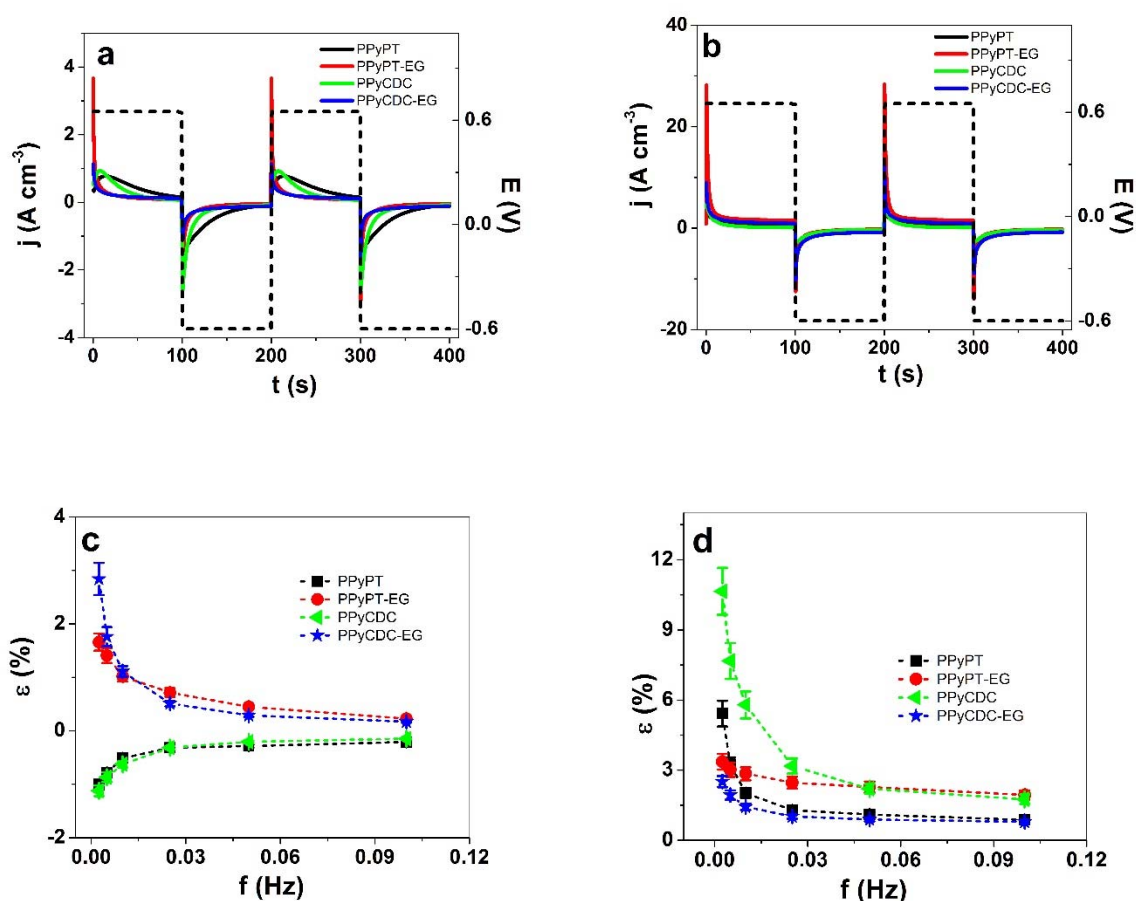

**Figure S5.** Square potential steps of PPyPT (black line), PPyPT-EG (red line), PPyCDC (green line) and PPyCDC-EG (blue line) showing current density time curves (two subsequent cycles 2nd to 3rd) at applied frequency 0.005Hz at potential range 0.65 to  $-0.6$ V ( $E$ , dashed line) using in (a), NaClO<sub>4</sub>-PC and in (b), NaClO<sub>4</sub>-aq electrolyte. Shown in (c), at applied frequencies ( $f$ ) in range 0.0025Hz to 0.1Hz the PPyPT (—■—), PPyPT-EG (—●—), PPyCDC (—▲—) and PPyCDC-EG (—★—) in NaClO<sub>4</sub>-PC strain  $\epsilon$  and in (d), in NaClO<sub>4</sub>-aq. Negative strain reflecting expansion at oxidation and positive strain expansion at reduction.

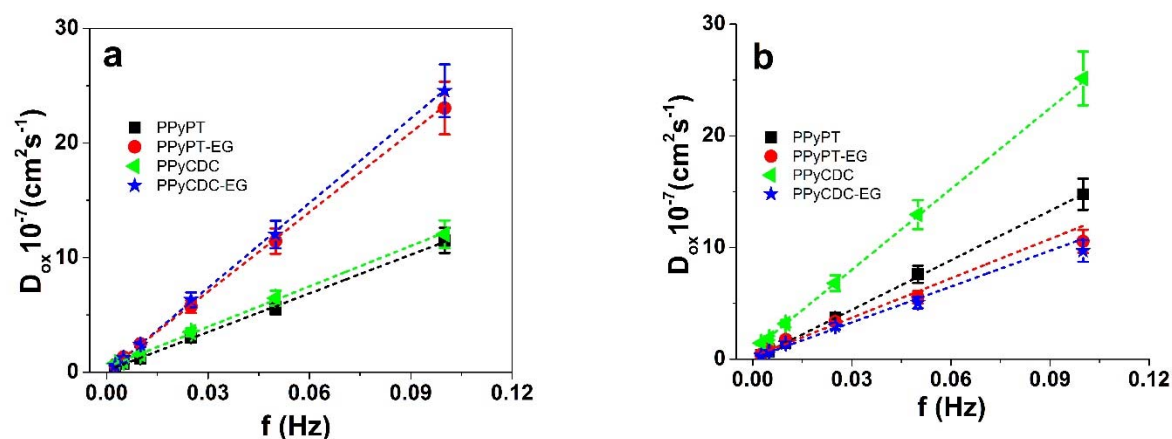

**Figure S6.** Diffusion coefficients at oxidation  $D_{ox}$  of PPyPT (■), PPyPT-EG (●), PPyCDC (▲) and PPyCDC-EG (★) showing in (a), NaClO<sub>4</sub>-PC and (b), NaClO<sub>4</sub>-aq electrolyte against applied frequencies  $f$  (0.0025 Hz to 0.1 Hz). The dashed lines represent the linear fit and shown only for orientation.

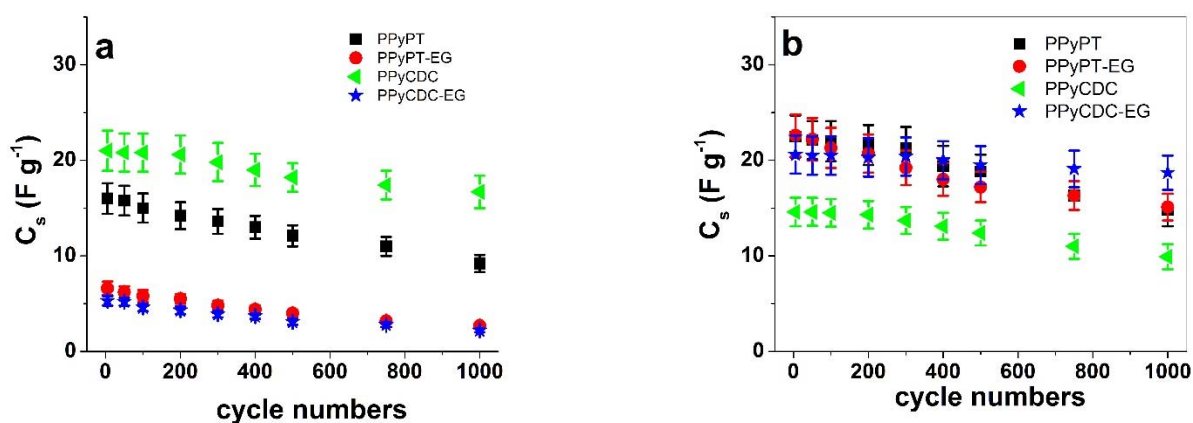

**Figure S7.** Cycle stability of the specific capacitance  $C_s$  against cycle numbers (1000 cycles, 0.1 Hz) at applied current density of  $\pm 2 \text{ A g}^{-1}$  of PPy composites such as PPyPT (■), PPyPT-EG (●), PPyCDC (▲) and PPyCDC-EG (★) applied at different electrolytes showing in (a), NaClO<sub>4</sub>-PC and (b), NaClO<sub>4</sub>-aq.

**Table S1.** Young's modulus  $Y$  of samples such as PPyPT, PPyPT-EG, PPyCDC and PPyCDC-EG from stiffness measurements stretching the film in  $1 \mu\text{m}$  (0.1% strain) to obtain the mass (stress kPa) before and after actuation cycles in NaClO<sub>4</sub>-PC and NaClO<sub>4</sub>-aq electrolytes.

| Samples   | NaClO <sub>4</sub> -PC |                  | NaClO <sub>4</sub> -aq |                   |
|-----------|------------------------|------------------|------------------------|-------------------|
|           | $Y$ [MPa], before      | $Y$ [MPa], after | $Y$ [MPa], before      | $Y$ , [MPa] after |
| PPyPT     | $115 \pm 8.7$          | $55.3 \pm 5.7$   | $117 \pm 11$           | $88.6 \pm 8.2$    |
| PPyPT-EG  | $23.7 \pm 2.4$         | $22.1 \pm 2.2$   | $14.5 \pm 1.2$         | $12.9 \pm 1.3$    |
| PPyCDC    | $43.5 \pm 4.2$         | $36.3 \pm 3.5$   | $21.4 \pm 2.1$         | $5.2 \pm 0.5$     |
| PPyCDC-EG | $15.6 \pm 1.5$         | $14.5 \pm 1.3$   | $21.1 \pm 2$           | $19.8 \pm 1.7$    |
